# Supplementary material
Source: MDPI journal article supplement (https://www.mdpi.com/2076-3417/14/10/4298)
Supplement: s1 [file s1]

Pictures of microgreens of safflower (*Carthamus tinctorius* L.), camelina (*Camelina sativa* L.), and nigella (*Nigella sativa* L.) at different stage of vegetation

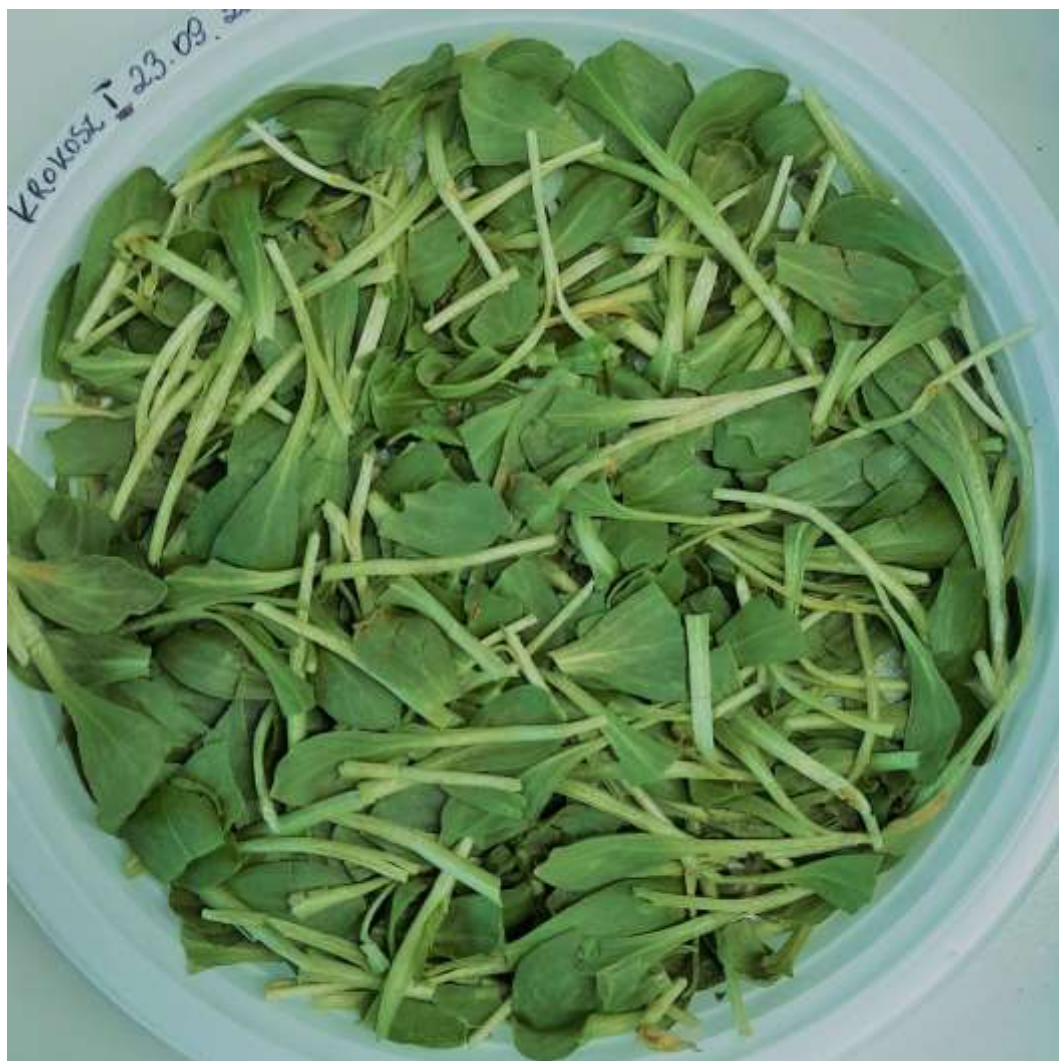

Microgreens of *Carthamus tinctorius* L. from the first harvest

Pictures of microgreens of safflower (*Carthamus tinctorius* L.), camelina (*Camelina sativa* L.), and nigella (*Nigella sativa* L.) at different stage of vegetation

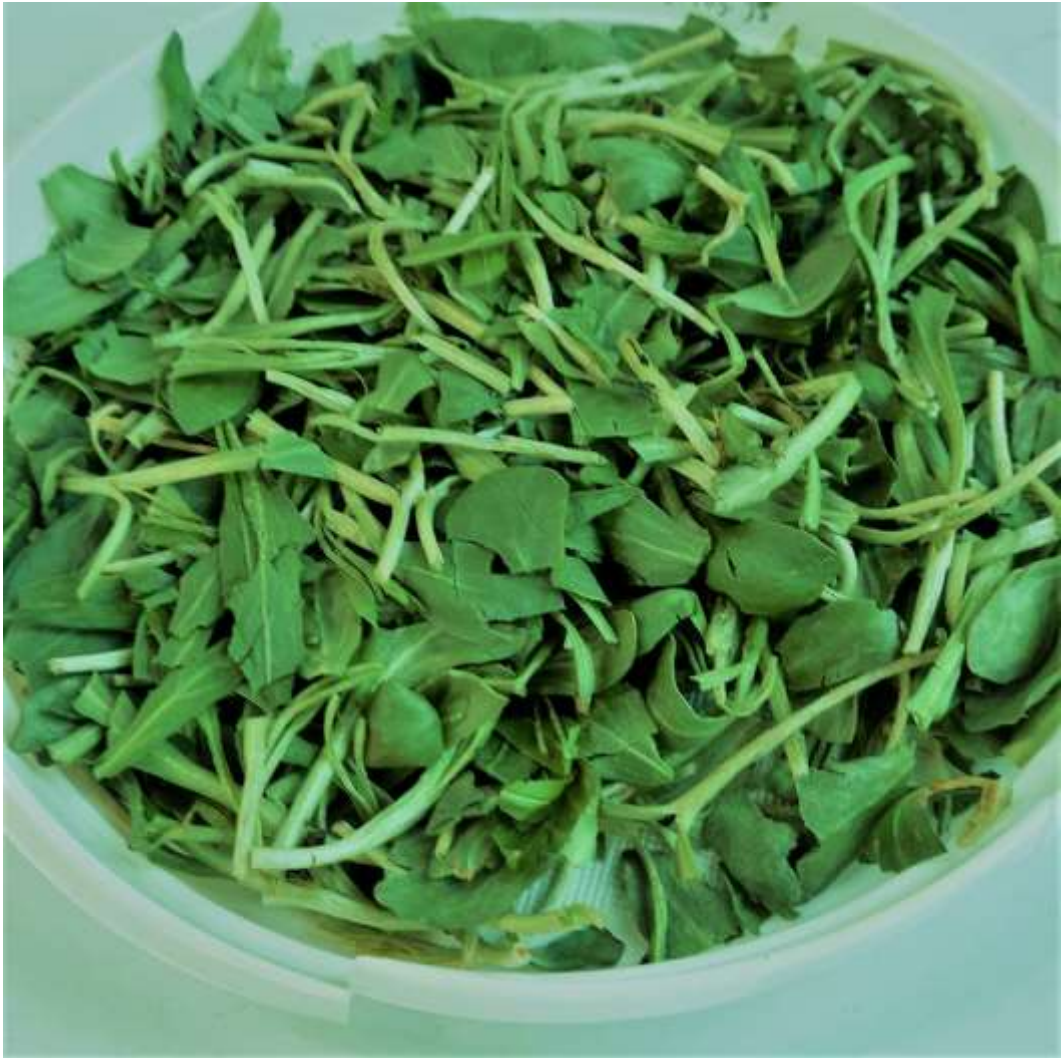

Microgreens of *Carthamus tinctorius* L. from the second harvest



Pictures of microgreens of safflower (*Carthamus tinctorius* L.), camelina (*Camelina sativa* L.), and nigella (*Nigella sativa* L.) at different stage of vegetation

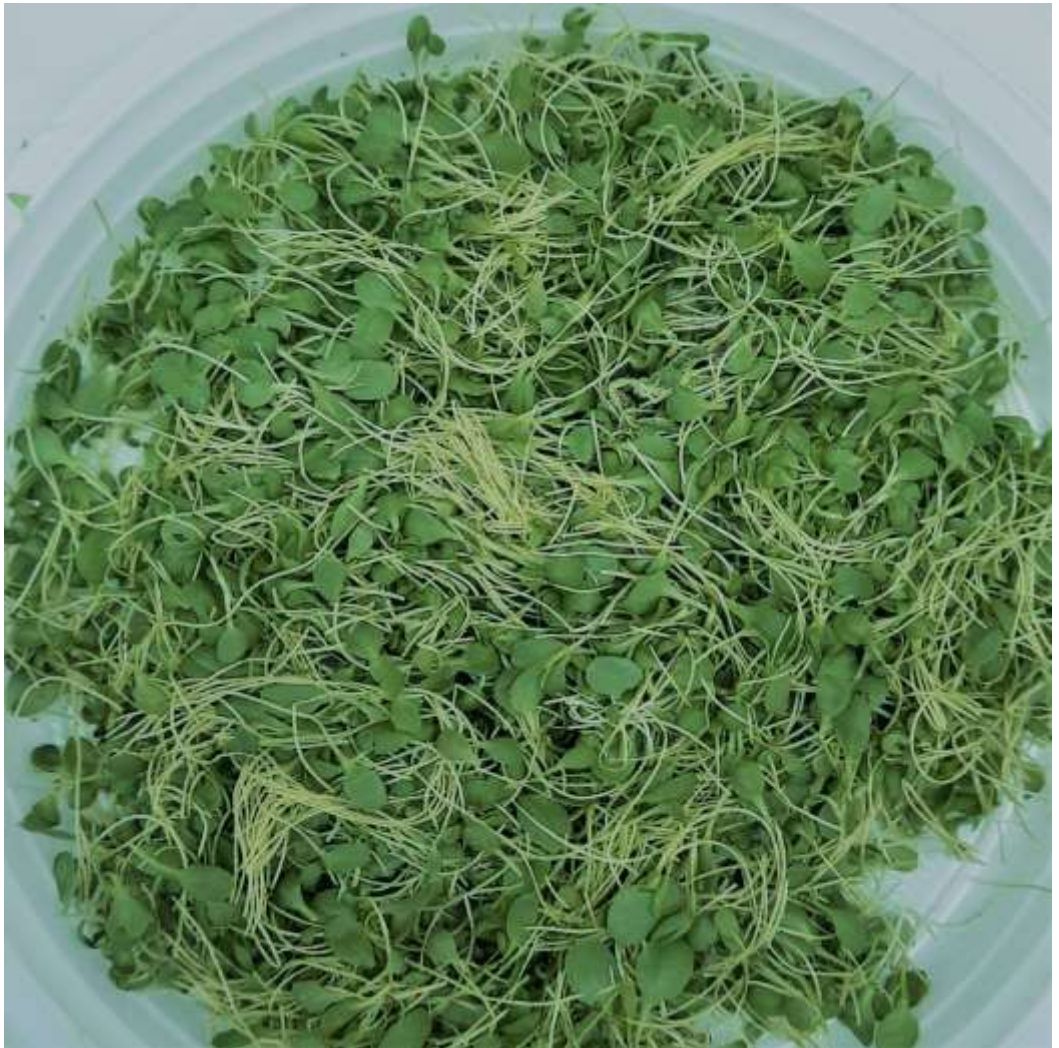

Microgreen of *Camelina sativa* L. from the first harvest

Pictures of microgreens of safflower (*Carthamus tinctorius* L.), camelina (*Camelina sativa* L.), and nigella (*Nigella sativa* L.) at different stage of vegetation

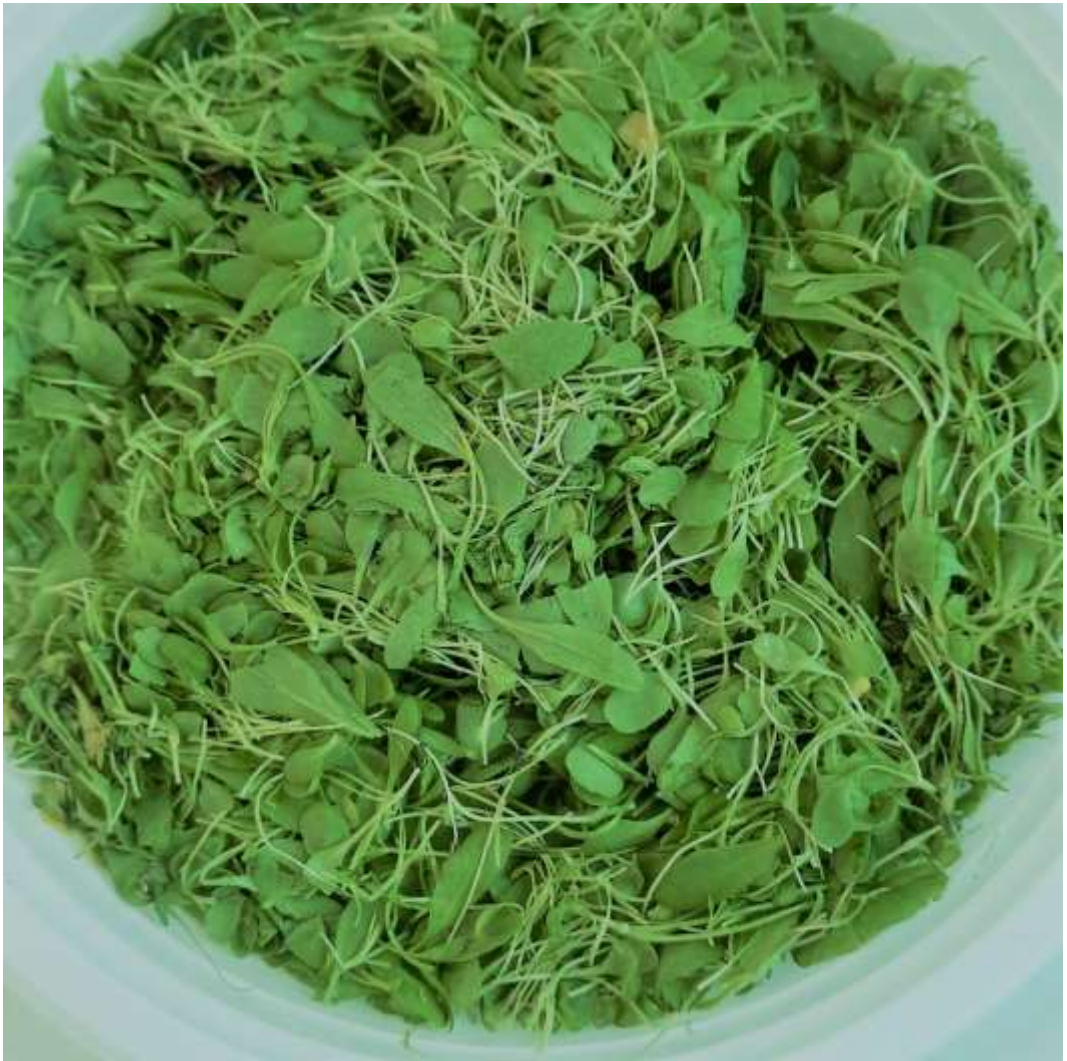

Microgreens of *Camelina sativa* L. from the second harvest



Pictures of microgreens of safflower (*Carthamus tinctorius* L.), camelina (*Camelina sativa* L.), and nigella (*Nigella sativa* L.) at different stage of vegetation

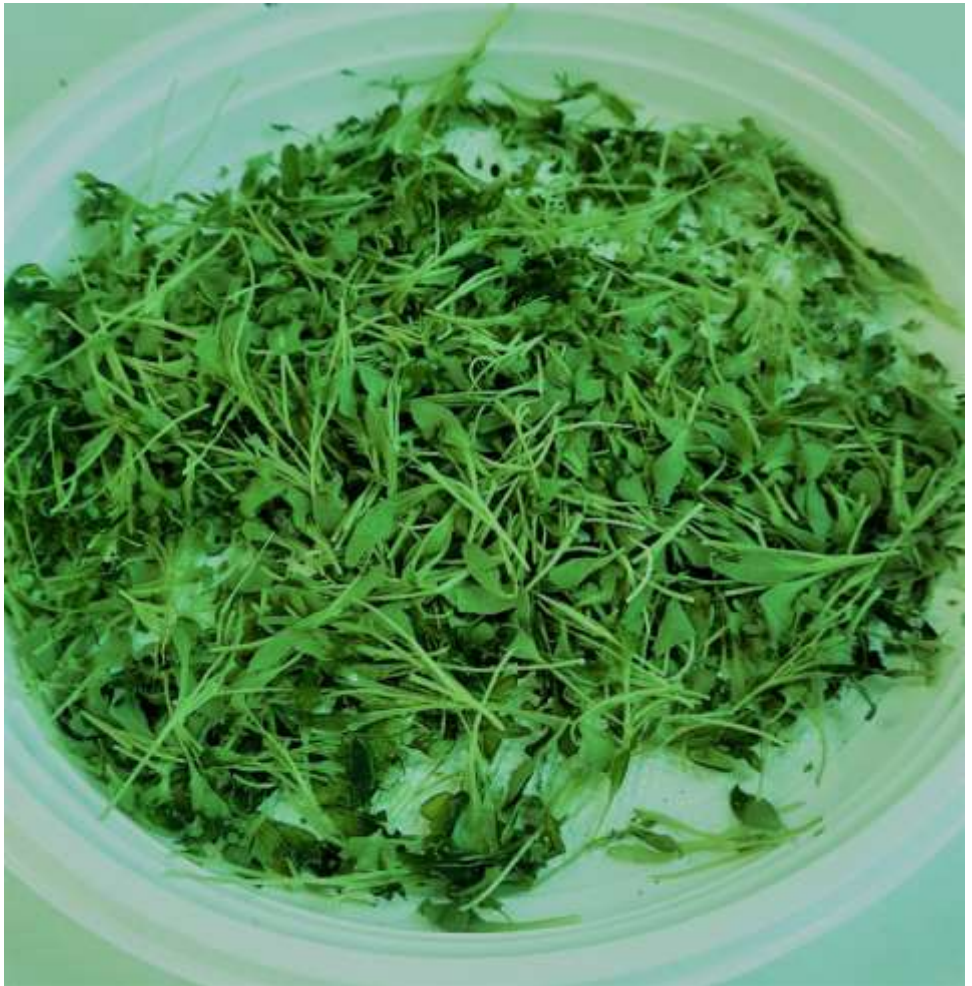

Microgreens of *Nigella sativa* L. from the first harvest

Pictures of microgreens of safflower (*Carthamus tinctorius* L.), camelina (*Camelina sativa* L.), and nigella (*Nigella sativa* L.) at different stage of vegetation

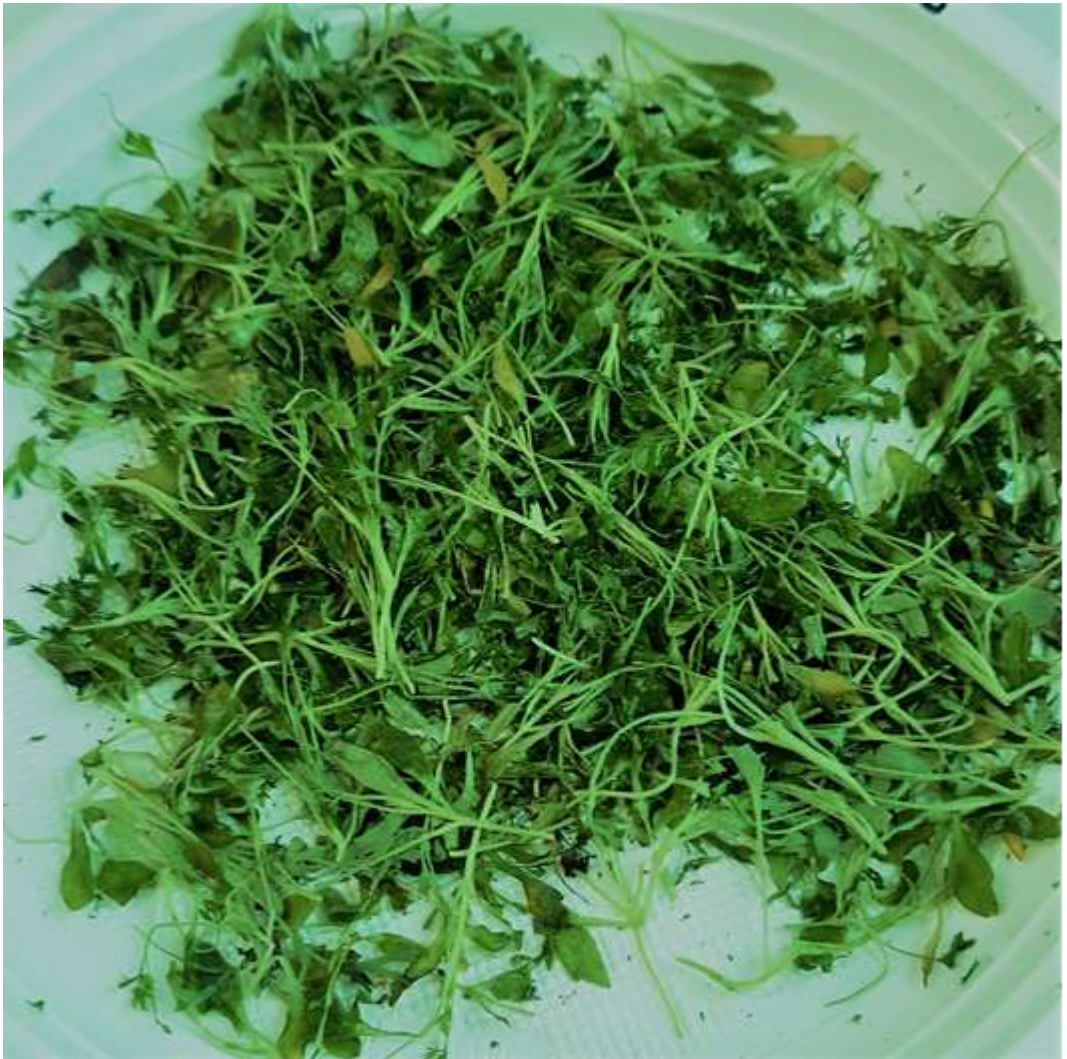

Microgreens of *Nigella sativa* L. from the second harvest
